# Supplementary material for: Cross-sectional associations between the neighborhood built environment and physical activity in a rural setting: the Bogalusa Heart Study
Source: Springer Nature journal article supplement (doi:10.1186/s12889-020-09509-4), 2020-09-18
Supplement: MOESM1 [file 18394292]

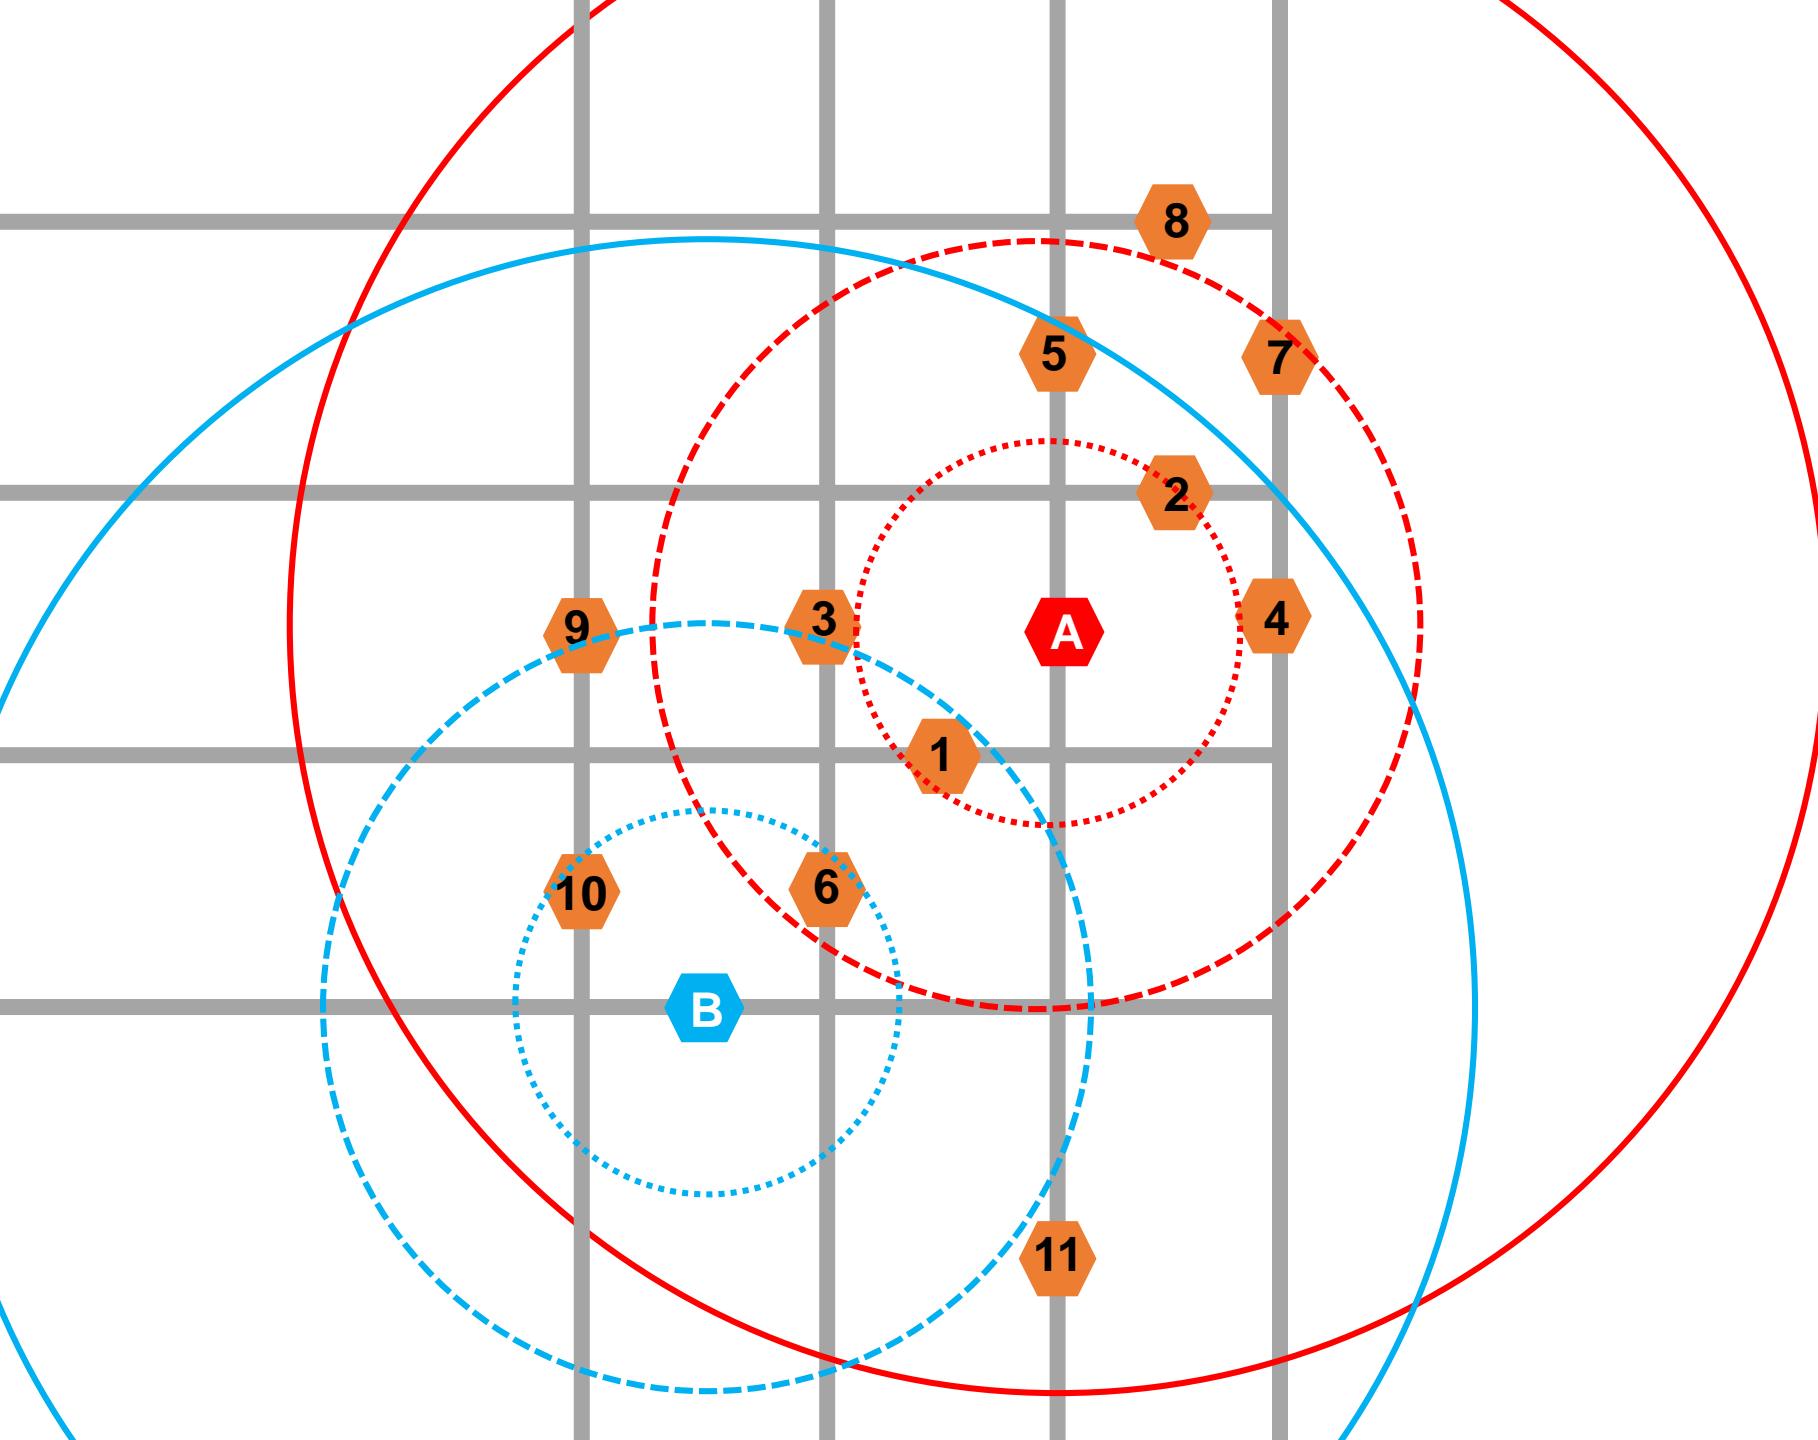

### Legend

-  Audited street segment
-  Street
-  0.25-mile buffer (A)
-  0.50-mile buffer (A)
-  1.00-mile buffer (A)
-  0.25-mile buffer (B)
-  0.50-mile buffer (B)
-  1.00-mile buffer (B)
